# Supplementary material for: Ductile Copolyesters Prepared Using Succinic Acid, 1,4-Butanediol, and Bis(2-hydroxyethyl) Terephthalate with Minimizing Generation of Tetrahydrofuran
Source: MDPI journal article supplement (doi:10.3390/polym16040519), 2024-02-14

# Supporting Information

## Copolyesters Prepared Using Succinic Acid, 1,4-Butanediol, and Bis(2-hydroxyethyl) Terephthalate

Sang Uk Park, Hyeon Jeong Seo, Yeong Hyun Seo, Ju Yong Park, Hyunjin Kim, Woo Yeon Cho,  
Pyung Cheon Lee, and Bun Yeoul Lee\*

Department of Molecular Science and Technology, Ajou University, Suwon 16499, South Korea; gkd13094@ajou.ac.kr (S.U.P.); hjseo@ajou.ac.kr (H.J.S.); tdg0730@ajou.ac.kr (Y.H.S.); pjy3741@ajou.ac.kr (J.Y.P.); khj610@ajou.ac.kr (H.J.K.); wycho418@ajou.ac.kr (W.Y.C.); pcleee@ajou.ac.kr; (P.C.L.)

\* Correspondence: bunyeoul@ajou.ac.kr (B.Y.L.); Tel.: +82-31-219-1844

**a)**

- PBS[5.0T; 1.0P; 220; Mg]
- PBS[5.0T; 1.0P; 210; Mg]
- PBS[5.0T; 1.0P; 200; Mg]
- PBS[5.0T; 1.0P; 190; Mg]

**b)**

- PBS[0T; 1.0P; 210; Mg]
- PBS[5.0T; 1.0P; 210; Mg]
- PBS[10T; 1.0P; 210; Mg]
- PBS[15T; 1.0P; 210; Mg]

**c)**

- PBS[5.0T; 1.0P; 210; Mg]
- PBS[5.0T; 2.0P; 210; Mg]

**Figure S3.** a) Images illustrating reactor fouling during the esterification of BD, SA, and dimethyl terephthalate, contrasted with b) image depicting the cleanliness observed in the corresponding reaction involving BD, SA, and BHET.

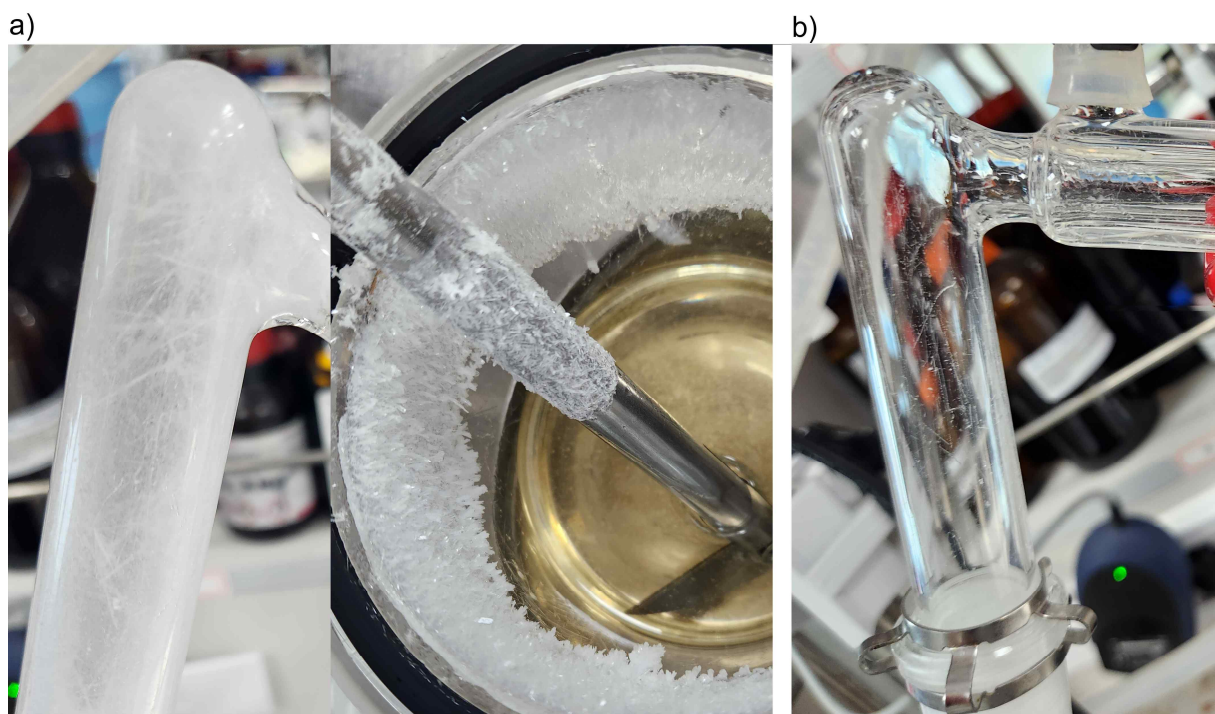

**Figure S4.** Temperature dependence of a)  $\tan \delta$ , b) storage modulus ( $E'$ ), c) loss modulus ( $E''$ ) curves from DMA runs illustrated for PBS[ $x$ T; Ti; 230] ( $x = 0, 5.0, 10, 15, 20$ ) series.

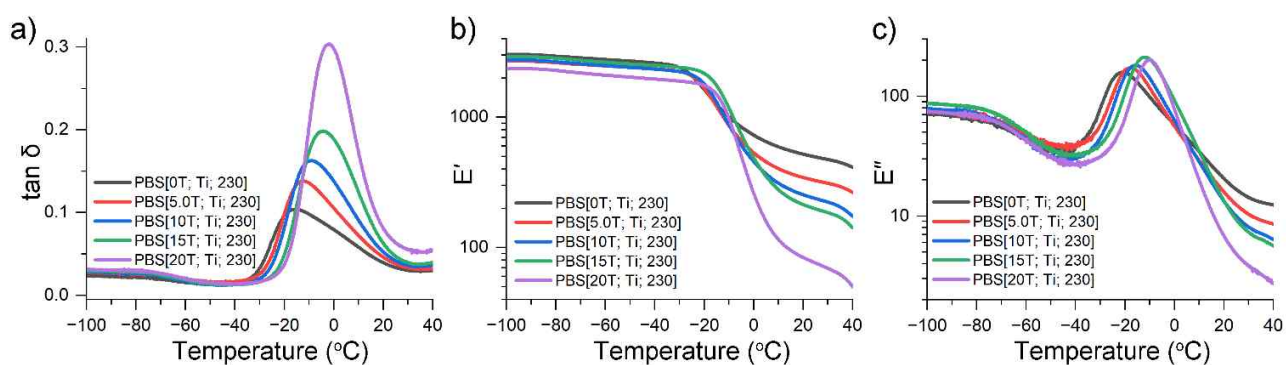

**Figure S5.** Tensile curves for copolyesters prepared with a) variation of temperatures (200, 210, and 220 °C), b) varying  $\text{H}_3\text{PO}_4$  feed quantities (1.0, 2.0, 3.0 mol% per SA), and c) varying the divalent metal species (Mg, Zn, Mn).

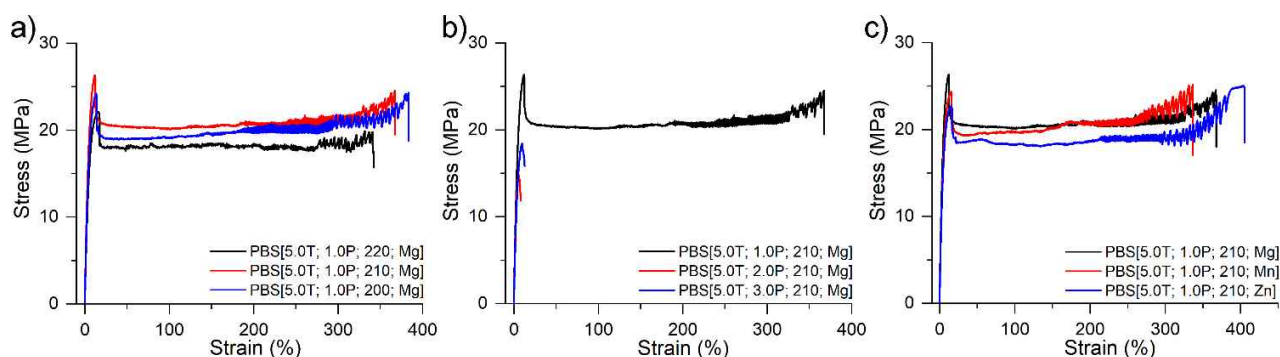

**Figure S6.** Comparison of dynamic moduli vs. angular frequency between a) PBS[0T; 1.0P; 210; Mg] and PBS[0T; Ti; 230], b) PBS[5T; 1.0P; 210; Mg] and PBS[5T; Ti; 230], c) PBS[15T; 1.0P; 210; Mg] and PBS[15T; Ti; 230], d) PBS[20T; 1.0P; 210; Mg] and PBS[20T; Ti; 230].

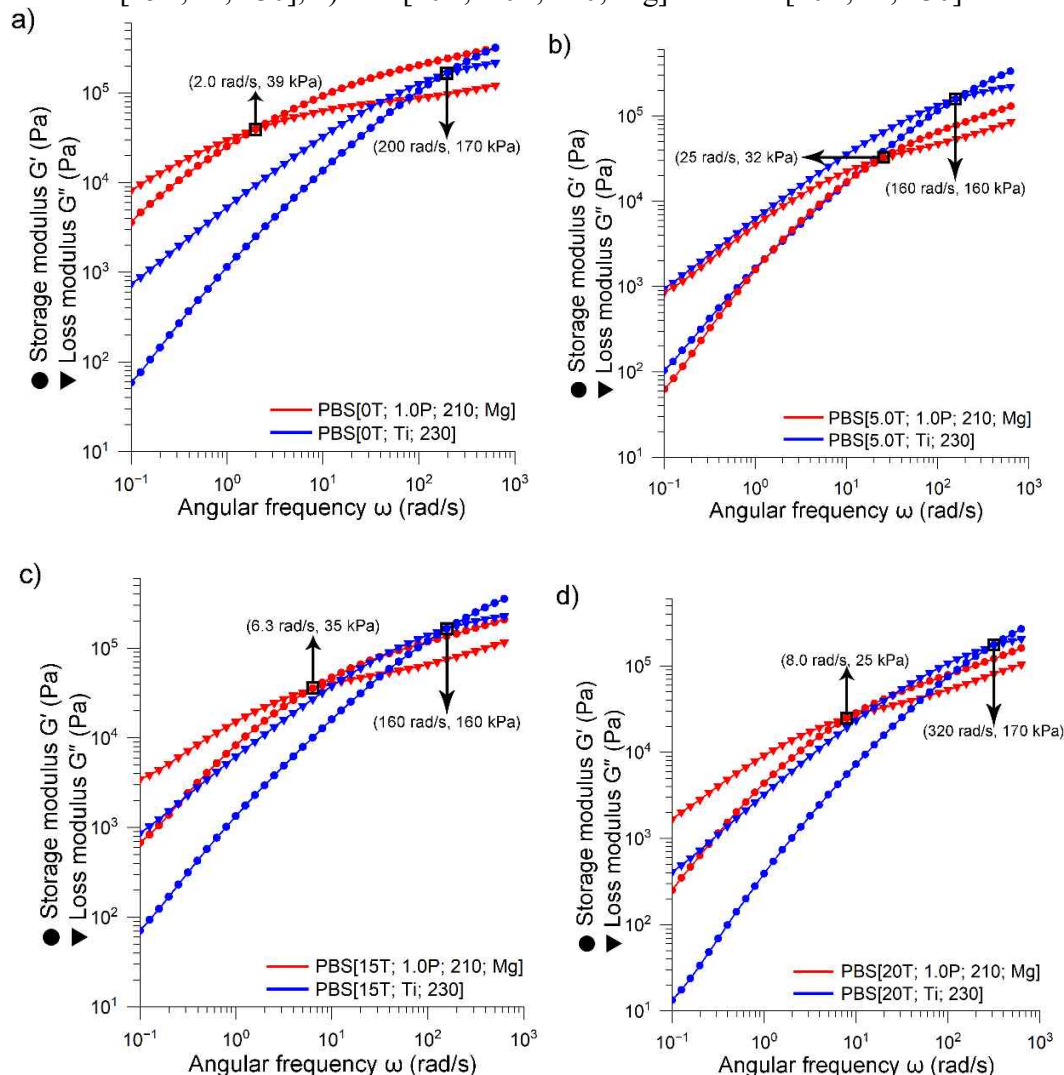

Supplement: s1 [file s1]
